# Supplementary material for: Limited value of pro-inflammatory oxylipins and cytokines as circulating biomarkers in endometriosis – a targeted ‘omics study
Source: PubMed Central journal article supplement (PMC4872128; doi:10.1038/srep26117), 2016-05-19
Supplement: srep26117-s1.pdf [file srep26117-s1.pdf]

-- Limited value of pro-inflammatory oxylipins and cytokines as circulating biomarkers in  
endometriosis – a targeted ‘omics study --

Yie Hou Lee<sup>1,‡,\*</sup>, Liang Cui<sup>2,‡</sup>, Jinling Fang<sup>3</sup>, Bernard Su Min Chern<sup>4</sup>, Heng Hao Tan<sup>5</sup>,  
Jerry K. Y. Chan<sup>1,5,6</sup>

<sup>1</sup>KK Research Centre, KK Women’s and Children’s Hospital, 100 Bukit Timah Road.  
Singapore 229899

<sup>2</sup>Singapore-MIT Alliance for Research and Technology; 1 CREATE Way, #04-13/14  
Enterprise Wing; Singapore 138602

<sup>3</sup>Saw Swee Hock School of Public Health, National University of Singapore; 12 Science  
Drive 2, #10-01, Singapore 117549

<sup>4</sup>Division of Obstetrics & Gynaecology KK Women’s and Children’s Hospital, Singapore,  
100 Bukit Timah Road. Singapore 229899

<sup>5</sup>Department of Reproductive Medicine, KK Women’s and Children’s Hospital,  
Singapore, 100 Bukit Timah Road. Singapore 229899

<sup>6</sup>Cancer and Stem Cell Biology, Duke-NUS Medical School. 8 College Road, Singapore  
169857

**Supplemental Table 1. Study patient characteristics**

|                                      | <b>EM-</b>   | <b>EM+<sub>Mild</sub></b> | <b>EM+<sub>Sev</sub></b> | <b>Total</b> | <b>p-value*</b>     |
|--------------------------------------|--------------|---------------------------|--------------------------|--------------|---------------------|
| <b>N</b>                             | 46           | 19                        | 38                       | 103          |                     |
| <b>Average age, years (SD)</b>       | 36.28 (6.99) | 33.79 (4.86)              | 35.05 (4.90)             | 34.6 (7.22)  | 0.283               |
| <b>Race</b>                          |              |                           |                          |              |                     |
| <b>Chinese</b>                       | 30           | 12                        | 28                       | 70           | 0.925               |
| <b>Malay</b>                         | 7            | 4                         | 4                        | 15           |                     |
| <b>Indian</b>                        | 3            | 1                         | 3                        | 8            |                     |
| <b>Others</b>                        | 6            | 2                         | 3                        | 11           |                     |
| <b>Type</b>                          |              |                           |                          |              |                     |
| <b>Peritoneal</b>                    | NA           | 13                        | 6                        | 19           | <0.0001             |
| <b>Ovarian</b>                       | NA           | 2                         | 36                       | 38           |                     |
| <b>Preoperative pain<sup>†</sup></b> |              |                           |                          |              |                     |
| <b>Asymptomatic</b>                  | 46           | 17                        | 27                       | 90           | 0.0004 <sup>a</sup> |
| <b>Symptomatic</b>                   | 0            | 2                         | 11                       | 13           | 0.1827 <sup>b</sup> |
| <b>Menstrual phase</b>               |              |                           |                          |              |                     |
| <b>Proliferative</b>                 | 17           | 4                         | 21                       | 42           | 0.036               |
| <b>Secretory</b>                     | 29           | 15                        | 17                       | 61           |                     |

\*1-way ANOVA was used for age; Fisher's exact or chi-square were used for the rest of the characteristics.

<sup>†</sup>Dysmenorrhea, dyspareunia, menorrhagia or pelvic pain

**Table S2. Oxylipin MRM transitions and mass spectrometry parameters**

| No. | Analyte                                         | Precursor Ion (m/z) | Product Ion (m/z) | Dwell | Fragmentor | Collision Energy | Cell Accelerator Voltage | Polarity   | Standard type | Internal Standard                         |
|-----|-------------------------------------------------|---------------------|-------------------|-------|------------|------------------|--------------------------|------------|---------------|-------------------------------------------|
| 1   | 11,12-DHET                                      | 337.2               | 167.1             | 100   | 380        | 17               |                          | 5 Negative |               | 12,13-DIHOME-d <sub>4</sub>               |
| 2   | 11,12-EET                                       | 319.2               | 167.1             | 25    | 380        | 10               |                          | 5 Negative |               | 12-HETE-d <sub>8</sub>                    |
| 3   | 11-HETE                                         | 319.2               | 167.1             | 25    | 380        | 12               |                          | 5 Negative |               | 12-HETE-d <sub>8</sub>                    |
| 4   | 11 $\beta$ -PGF <sub>2</sub> $\alpha$           | 353.2               | 309.2             | 25    | 380        | 16               |                          | 5 Negative |               | PGF <sub>2</sub> $\alpha$ -d <sub>4</sub> |
| 5   | 12,13-DIHOME                                    | 313.2               | 183.1             | 100   | 380        | 25               |                          | 5 Negative |               | 12,13-DIHOME-d <sub>4</sub>               |
| 6   | 12,13-EODE                                      | 295.2               | 195.2             | 100   | 380        | 15               |                          | 5 Negative |               | 12,13-EODE-d <sub>4</sub>                 |
| 7   | 12-HETE                                         | 319.2               | 179.1             | 100   | 380        | 13               |                          | 5 Negative |               | 12-HETE-d <sub>8</sub>                    |
| 8   | 12-HpETE                                        | 335.2               | 273.3             | 25    | 380        | 3                |                          | 5 Negative |               | 12-HETE-d <sub>8</sub>                    |
| 9   | 13,14-dihydro-15-keto-PGE <sub>2</sub>          | 351.2               | 175.2             | 25    | 380        | 21               |                          | 5 Negative |               | PGF <sub>2</sub> $\alpha$ -d <sub>4</sub> |
| 10  | 13,14-dihydro-15-keto-PGF <sub>2</sub> $\alpha$ | 353.2               | 183.1             | 25    | 380        | 25               |                          | 5 Negative |               | PGF <sub>2</sub> $\alpha$ -d <sub>4</sub> |
| 11  | 13-HODE                                         | 295.2               | 195.2             | 100   | 380        | 15               |                          | 5 Negative |               | 9-HODE-d <sub>4</sub>                     |
| 12  | 13-HpODE                                        | 311.2               | 183.1             | 25    | 380        | 36               |                          | 5 Negative |               | 9-HODE-d <sub>4</sub>                     |
| 13  | 14,15-DHET                                      | 337.2               | 207.2             | 100   | 380        | 17               |                          | 5 Negative |               | 12,13-DIHOME-d <sub>4</sub>               |
| 14  | 14,15-EET                                       | 319.2               | 219.2             | 100   | 380        | 7                |                          | 5 Negative |               | 12-HETE-d <sub>8</sub>                    |
| 15  | 15-deoxy-12,14-PGD <sub>2</sub>                 | 333.2               | 271.1             | 25    | 380        | 12               |                          | 5 Negative |               | PGF <sub>2</sub> $\alpha$ -d <sub>4</sub> |
| 16  | 15-HEPE                                         | 317.2               | 219.2             | 100   | 380        | 9                |                          | 5 Negative |               | 12-HETE-d <sub>8</sub>                    |
| 17  | 15-HETE                                         | 319.2               | 219.2             | 100   | 380        | 5                |                          | 5 Negative |               | 12-HETE-d <sub>8</sub>                    |
| 18  | 15-keto-PGE <sub>2</sub>                        | 349.2               | 287.2             | 25    | 380        | 11               |                          | 5 Negative |               | PGF <sub>2</sub> $\alpha$ -d <sub>4</sub> |
| 19  | 15-keto-PGF <sub>1</sub> $\alpha$               | 353.2               | 317.2             | 25    | 380        | 8                |                          | 5 Negative |               | PGF <sub>2</sub> $\alpha$ -d <sub>4</sub> |
| 20  | 1a,1b-dihomo PGF <sub>2</sub> $\alpha$          | 381.3               | 337.3             | 25    | 380        | 20               |                          | 5 Negative |               | PGF <sub>2</sub> $\alpha$ -d <sub>4</sub> |
| 21  | 2,3-dinor-11 $\beta$ PGF <sub>2</sub> $\alpha$  | 325.2               | 145.1             | 25    | 380        | 12               |                          | 5 Negative |               | PGF <sub>2</sub> $\alpha$ -d <sub>4</sub> |
| 22  | 20-HETE                                         | 319.2               | 289.2             | 100   | 380        | 17               |                          | 5 Negative |               | 12-HETE-d <sub>8</sub>                    |
| 23  | 20-hydroxy PGF <sub>2</sub> $\alpha$            | 369.2               | 193.1             | 25    | 380        | 28               |                          | 5 Negative |               | PGF <sub>2</sub> $\alpha$ -d <sub>4</sub> |
| 24  | 5,15-DIHETE                                     | 335.2               | 173.1             | 25    | 380        | 10               |                          | 5 Negative |               | 12-HETE-d <sub>8</sub>                    |
| 25  | 5,6-DHET                                        | 337.2               | 145.1             | 25    | 380        | 14               |                          | 5 Negative |               | 12-HETE-d <sub>8</sub>                    |
| 26  | 5,6-DIHETE                                      | 335.2               | 115.1             | 25    | 380        | 16               |                          | 5 Negative |               | 12-HETE-d <sub>8</sub>                    |
| 27  | 5-HEPE                                          | 317.2               | 115.1             | 100   | 380        | 11               |                          | 5 Negative |               | 12-HETE-d <sub>8</sub>                    |
| 28  | 5-HETE                                          | 319.2               | 115.1             | 100   | 380        | 13               |                          | 5 Negative |               | 12-HETE-d <sub>8</sub>                    |

|    |                                             |       |       |     |     |    |            |                                   |
|----|---------------------------------------------|-------|-------|-----|-----|----|------------|-----------------------------------|
| 29 | 5-OxoETE                                    | 317.2 | 203.2 | 100 | 380 | 17 | 5 Negative | 12-HETE-d <sub>8</sub>            |
| 30 | 6,15-diketo-13,14-dihydro-PGF <sub>1α</sub> | 369.2 | 113.2 | 25  | 380 | 30 | 5 Negative | PGF <sub>2α</sub> -d <sub>4</sub> |
| 31 | 6-keto-PGE <sub>1</sub>                     | 367.2 | 143.1 | 25  | 380 | 16 | 5 Negative | PGF <sub>2α</sub> -d <sub>4</sub> |
| 32 | 6-keto-PGF <sub>1α</sub>                    | 369.2 | 163.1 | 200 | 380 | 29 | 5 Negative | PGF <sub>2α</sub> -d <sub>4</sub> |
| 33 | 8,9-DHET                                    | 337.2 | 127.1 | 25  | 380 | 20 | 5 Negative | 12,13-DIHOME-d <sub>4</sub>       |
| 34 | 8,9-EET                                     | 319.2 | 257.2 | 25  | 380 | 8  | 5 Negative | 12-HETE-d <sub>8</sub>            |
| 35 | 8-HETE                                      | 319.2 | 155.1 | 25  | 380 | 12 | 5 Negative | 12-HETE-d <sub>8</sub>            |
| 36 | 8S,15S-DIHETE                               | 335.2 | 235.2 | 25  | 380 | 12 | 5 Negative | 12-HETE-d <sub>8</sub>            |
| 37 | 9,10-DIHOME                                 | 313.2 | 201.1 | 100 | 380 | 25 | 5 Negative | 12,13-DIHOME-d <sub>4</sub>       |
| 38 | 9,10-EODE                                   | 295.2 | 171.1 | 100 | 380 | 15 | 5 Negative | 12,13-EODE-d <sub>4</sub>         |
| 39 | 9-HETE                                      | 319.2 | 151.1 | 100 | 380 | 11 | 5 Negative | 12-HETE-d <sub>8</sub>            |
| 40 | 9-HODE                                      | 295.2 | 171.1 | 100 | 380 | 15 | 5 Negative | 9-HODE-d <sub>4</sub>             |
| 41 | AA                                          | 317.2 | 203.2 | 25  | 380 | 17 | 5 Negative | PGF <sub>2α</sub> -d <sub>4</sub> |
| 42 | Arachidonol ethanolamide                    | 346.2 | 259.1 | 25  | 380 | 9  | 5 Negative | PGF <sub>2α</sub> -d <sub>4</sub> |
| 43 | LA                                          | 295.2 | 195.2 | 25  | 380 | 15 | 5 Negative | PGF <sub>2α</sub> -d <sub>4</sub> |
| 44 | LTB <sub>4</sub>                            | 335.2 | 195.1 | 25  | 380 | 12 | 5 Negative | PGF <sub>2α</sub> -d <sub>4</sub> |
| 45 | LTE <sub>4</sub>                            | 438.2 | 333.2 | 100 | 380 | 15 | 5 Negative | PGF <sub>2α</sub> -d <sub>4</sub> |
| 46 | PGA <sub>2</sub>                            | 333.2 | 271.2 | 25  | 380 | 12 | 5 Negative | PGF <sub>2α</sub> -d <sub>4</sub> |
| 47 | PGB <sub>2</sub>                            | 333.2 | 175.1 | 25  | 380 | 16 | 5 Negative | PGF <sub>2α</sub> -d <sub>4</sub> |
| 48 | PGE <sub>2</sub>                            | 351.2 | 271.2 | 25  | 380 | 14 | 5 Negative | PGF <sub>2α</sub> -d <sub>4</sub> |
| 49 | PGE <sub>2</sub> ethanol amide              | 299.2 | 198.2 | 25  | 380 | 15 | 5 Negative | PGF <sub>2α</sub> -d <sub>4</sub> |
| 50 | PGF <sub>1α</sub>                           | 355.2 | 293.2 | 25  | 380 | 21 | 5 Negative | PGF <sub>2α</sub> -d <sub>4</sub> |
| 51 | PGF <sub>2α</sub>                           | 353.2 | 309.2 | 25  | 380 | 15 | 5 Negative | PGF <sub>2α</sub> -d <sub>4</sub> |
| 52 | PGK <sub>2</sub>                            | 349.2 | 287.3 | 25  | 380 | 16 | 5 Negative | PGF <sub>2α</sub> -d <sub>4</sub> |
| 53 | TXB                                         | 369.2 | 169.1 | 200 | 380 | 17 | 5 Negative | TXB-d <sub>4</sub>                |
| 54 | TXB-d <sub>4</sub>                          | 373.2 | 173.1 | 200 | 380 | 20 | 5 Negative |                                   |
| 55 | PGF <sub>2α</sub> -d <sub>4</sub>           | 357.3 | 313.2 | 200 | 380 | 20 | 5 Negative |                                   |
| 56 | 9-HODE-d <sub>4</sub>                       | 299.2 | 172.1 | 100 | 380 | 15 | 5 Negative |                                   |
| 57 | 12-HETE-d <sub>8</sub>                      | 327.3 | 184.2 | 100 | 380 | 13 | 5 Negative |                                   |
| 58 | 12,13-EODE-d <sub>4</sub>                   | 299.2 | 198.2 | 100 | 380 | 15 | 5 Negative |                                   |
| 59 | 12,13-DIHOME-d <sub>4</sub>                 | 317.3 | 185.2 | 100 | 380 | 25 | 5 Negative |                                   |

Deuterated standards  
With external standards  
Without external standards

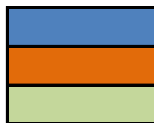

**Table S3. Oxylipin nomenclature**

| <b>Acronym</b>                              | <b>Full name</b>                                        |
|---------------------------------------------|---------------------------------------------------------|
| 20-hydroxy PGF <sub>2α</sub>                | 20-hydroxy-prostaglandin F <sub>2α</sub>                |
| 6-keto-PGF <sub>1α</sub>                    | 6-keto-prostaglandin F <sub>1α</sub>                    |
| 2,3-dinor-11β PGF <sub>2α</sub>             | 2,3-dinor-11-beta-prostaglandin F <sub>2α</sub>         |
| 6-keto-PGE <sub>1</sub>                     | 6,15-diketo-13,14-dihydro--prostaglandin E <sub>1</sub> |
| 6,15-diketo-13,14-dihydro-PGF <sub>1α</sub> | 6-keto-prostaglandin F <sub>1α</sub>                    |
| TXB                                         | thromboxane B                                           |
| 11β-PGF <sub>2α</sub>                       | 11-beta-prostaglandin F <sub>2α</sub>                   |
| PGF <sub>2α</sub>                           | prostaglandin F <sub>2α</sub>                           |
| PGF <sub>1α</sub>                           | prostaglandin F <sub>1α</sub>                           |
| PGE <sub>2</sub>                            | prostaglandin E <sub>2</sub>                            |
| PGE <sub>2</sub> ethanol amide              | prostaglandin E <sub>2</sub> ethanol amide              |
| PGK <sub>2</sub>                            | prostaglandin K <sub>2</sub>                            |
| 15-keto-PGE <sub>2</sub>                    | 15-keto-prostaglandin E <sub>2</sub>                    |
| 15-keto-PGF <sub>1α</sub>                   | 15-keto-prostaglandin F <sub>1α</sub>                   |
| 13,14-dihydro-15-keto-PGE <sub>2</sub>      | 13,14-dihydro-keto-prostaglandin E <sub>2</sub>         |
| 13,14-dihydro-15-keto-PGF <sub>2α</sub>     | 13,14-dihydro-keto-prostaglandin F <sub>2α</sub>        |
| 1a,1b-dihomo PGF <sub>2α</sub>              | 1a,1b-dihomo-prostaglandin F <sub>2α</sub>              |
| 15-deoxy-12,14-PGD <sub>2</sub>             | 15-deoxy-12,14-prostaglandin D <sub>2</sub>             |
| PGB <sub>2</sub>                            | prostaglandin B <sub>2</sub>                            |
| LTE <sub>4</sub>                            | leukotriene E <sub>4</sub>                              |
| 8S,15S-DiHETE                               | 8S,15S-dihydroxy-eicosatetraenoic acid                  |
| 5,15-DiHETE                                 | 5,15-dihydroxy-eicosatetraenoic acid                    |
| PGA <sub>2</sub>                            | prostaglandin A <sub>2</sub>                            |
| LTB <sub>4</sub>                            | leukotriene B <sub>4</sub>                              |
| 12,13-DiHOME                                | 12,13-dihydroxy-octadecenoic acid                       |
| 9,10-DiHOME                                 | 9,10-dihydroxy-octadecenoic acid                        |
| 14,15-DHET                                  | 14,15-dihydroxy-eicosatrienoic acid                     |
| 11,12-DHET                                  | 11,12-dihydroxy-eicosatrienoic acid                     |
| 8,9-DHET                                    | 8,9-dihydroxy-eicosatrienoic acid                       |
| 5,6-DiHETE                                  | 5,6-dihydroxy-eicosatetraenoic acid                     |
| 15-HEPE                                     | 15-hydroxy-eicosapentaenoic acid                        |
| 20-HETE                                     | 20-hydroxy-eicosatetraenoic acid                        |
| 5,6-DHET                                    | 5,6-dihydroxy-eicosatrienoic acid                       |
| 5-HEPE                                      | 5-hydroxy-eicosapentaenoic acid                         |
| 13-HODE                                     | 13-hydroxy-octadecadienoic acid                         |
| 9-HODE                                      | 9-hydroxy-octadecadienoic acid                          |
| 15-HETE                                     | 15-hydroxy-eicosatetraenoic acid                        |
| 11-HETE                                     | 11-hydroxy-eicosatetraenoic acid                        |
| 8-HETE                                      | 8-hydroxy-eicosatetraenoic acid                         |
| 12-HETE                                     | 12-hydroxy-eicosatetraenoic acid                        |
| 12-HpETE                                    | 12-Hydroperoxy-eicosatetraenoic acid                    |

|                          |                                     |
|--------------------------|-------------------------------------|
| 9-HETE                   | 9-hydroxy-eicosatetraenoic acid     |
| 5-HETE                   | 5-hydroxy-eicosatetraenoic acid     |
| 12,13-EODE               | 12,13-epoxyoctadecenoic acid        |
| 14,15-EET                | 14,15-epoxyeicosatrienoic acid      |
| 9,10-EODE                | 9,10-epoxyoctadecenoic acid         |
| 11,12-EET                | 11,12-epoxyeicosatrienoic acid      |
| 5-OxoETE                 | 5-oxo-eicosatetraenoic acid         |
| 8,9-EET                  | 8,9-epoxyeicosatrienoic acid        |
| 13-HpODE                 | 13-hydroperoxy-octadecadienoic acid |
| Arachidonol ethanolamide | Arachidonol ethanolamide            |
| AA                       | Arachidonic acid                    |
| LA                       | Linoleic acid                       |

**Table S4. Luminex assay parameters**

| No. | Analyte        | % detected in patients | Average Intra-CV% | Working sensitivity (LOQ; pg/mL) | Assay sensitivity (LOD*; pg/mL) |
|-----|----------------|------------------------|-------------------|----------------------------------|---------------------------------|
| 1   | IL-1 $\beta$   | 100.0                  | 6.14              | 2.186                            | 0.021                           |
| 2   | IL-1 $\alpha$  | 100.0                  | 7.39              | 1.989                            | 2.695                           |
| 3   | IL-2           | 5.0                    | 6.36              | 0.974                            | 0.829                           |
| 4   | IL-4           | 97.5                   | 6.23              | 0.222                            | 0.0009                          |
| 5   | IL-5           | 5.0                    | 8.56              | 2.19                             | 0.105                           |
| 6   | IL-6           | 85.0                   | 5.92              | 1.205                            | 0.0161                          |
| 7   | IL-7           | 100.0                  | 6.59              | 2.361                            | 0.141                           |
| 8   | IL-8           | 100.0                  | 5.44              | 1.877                            | 0.267                           |
| 9   | IL-9           | 70.0                   | 4.87              | 2.624                            | 0.0091                          |
| 10  | IL-10          | 77.5                   | 6.56              | 1.772                            | 0.0041                          |
| 11  | IL-12          | 85.0                   | 10.00             | 2.19                             | 0.0062                          |
| 12  | IL-13          | 50.0                   | 5.69              | 2.117                            | 0.0024                          |
| 13  | IL-15          | 5.0                    | 7.94              | 1.639                            | 2.963                           |
| 14  | IL-17          | 50.0                   | 5.91              | 1.213                            | 0.0045                          |
| 15  | Eotaxin        | 82.5                   | 10.48             | 1.538                            | 0.00261                         |
| 16  | FGF basic      | 85.0                   | 5.25              | 1.064                            | 0.0201                          |
| 17  | G-CSF          | 100.0                  | 6.96              | 1.732                            | 1.153                           |
| 18  | GM-CSF         | 35.0                   | 5.86              | 0.651                            | 0.044                           |
| 19  | IFN- $\gamma$  | 100.0                  | 5.06              | 6.42                             | 0.183                           |
| 20  | IP-10          | 100.0                  | 5.71              | 8.522                            | 20.441                          |
| 21  | MCP-1          | 95.0                   | 5.01              | 1.524                            | 0.0131                          |
| 22  | MIP-1 $\alpha$ | 52.5                   | 5.73              | 1.409                            | 0.00011                         |
| 23  | PDGF-bb        | 100.0                  | 3.48              | 6.655                            | 123.941                         |
| 24  | MIP-1 $\beta$  | 100.0                  | 5.29              | 1.395                            | 2.307                           |
| 25  | RANTES         | 40.0                   | 2.98              | 1.924                            | 462.07                          |
| 26  | TNF- $\alpha$  | 92.5                   | 6.91              | 4.612                            | 0.0062                          |
| 27  | VEGF           | 95.0                   | 5.39              | 2.407                            | 0.0056                          |

 Not detected

\* 1/10 of lowest detectable value
